# Supplementary material for: Did the 2022 Hunga eruption impact the noctilucent cloud season in 2023/24 and 2024?
Source: Copernicus journal article supplement (doi:10.5194/acp-25-3635-2025), 2025-03-27
Supplement: Supplementary file 1 [file acp-25-3635-2025-supplement.pdf]

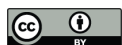

*Supplement of*

## **Did the 2022 Hunga eruption impact the noctilucent cloud season in 2023/24 and 2024?**

**Sandra Wallis et al.**

*Correspondence to:* Sandra Wallis ([sandra.wallis@uni-greifswald.de](mailto:sandra.wallis@uni-greifswald.de))

The copyright of individual parts of the supplement might differ from the article licence.

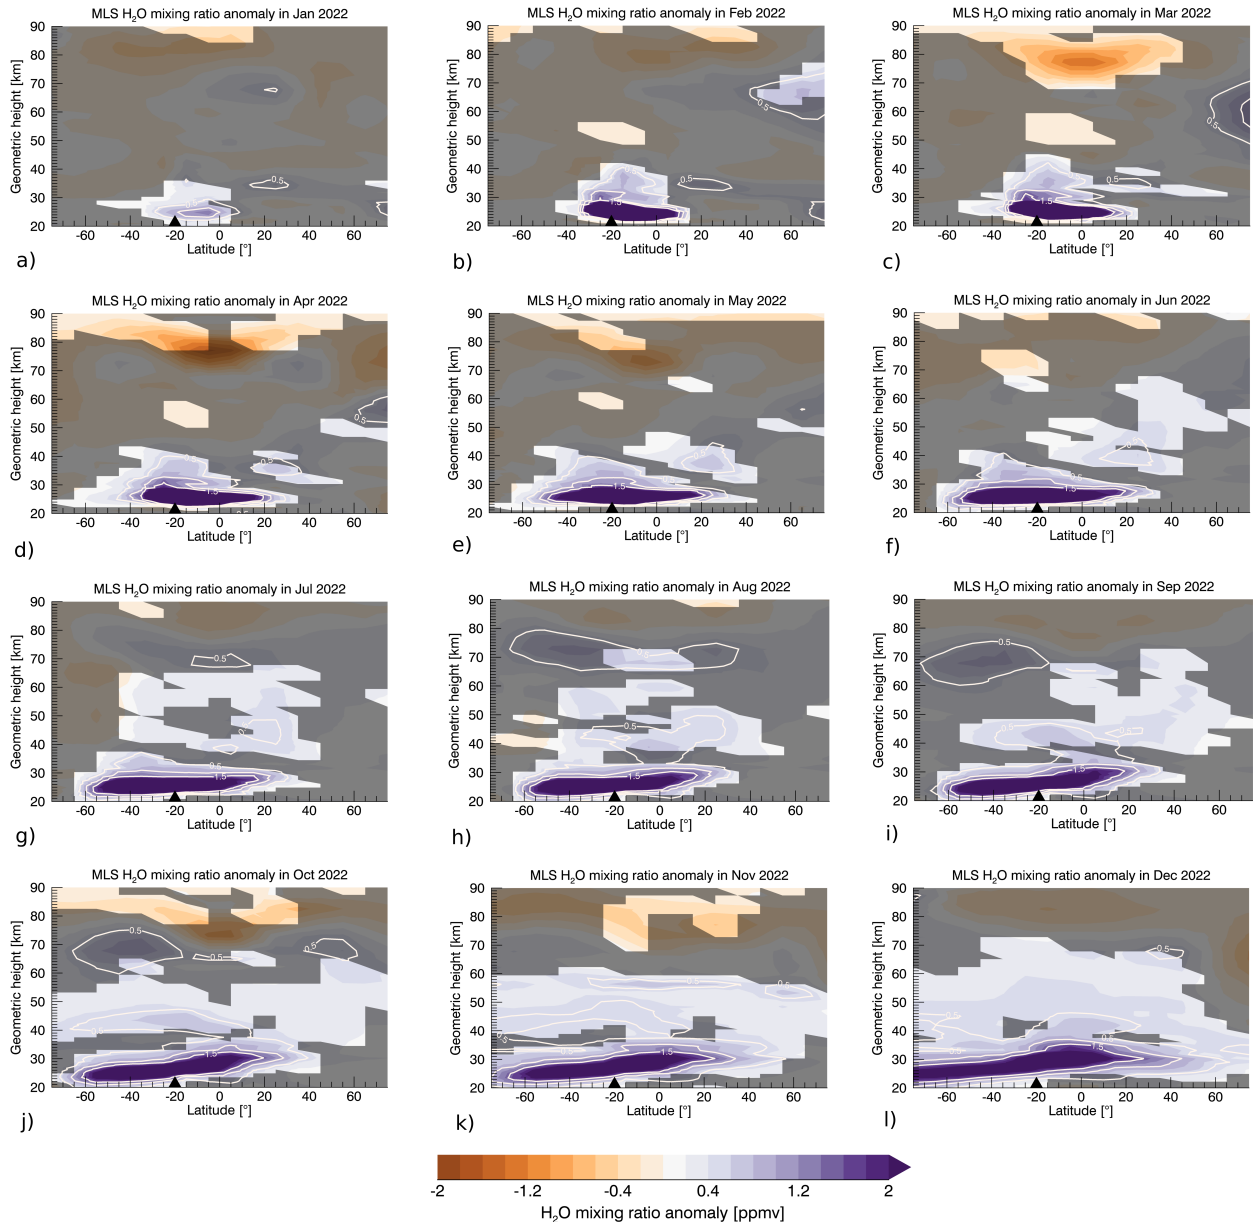

**Figure S1.** Monthly mean water vapour mixing ratio anomaly from MLS data for January to December 2022 (a - l). The reference period is 2017 - 2021 and anomalies that are less than 3 standard deviation of the reference period are considered not significant and marked with a dark grey colour. The triangle denotes the latitude position of the Hunga Tonga volcano.

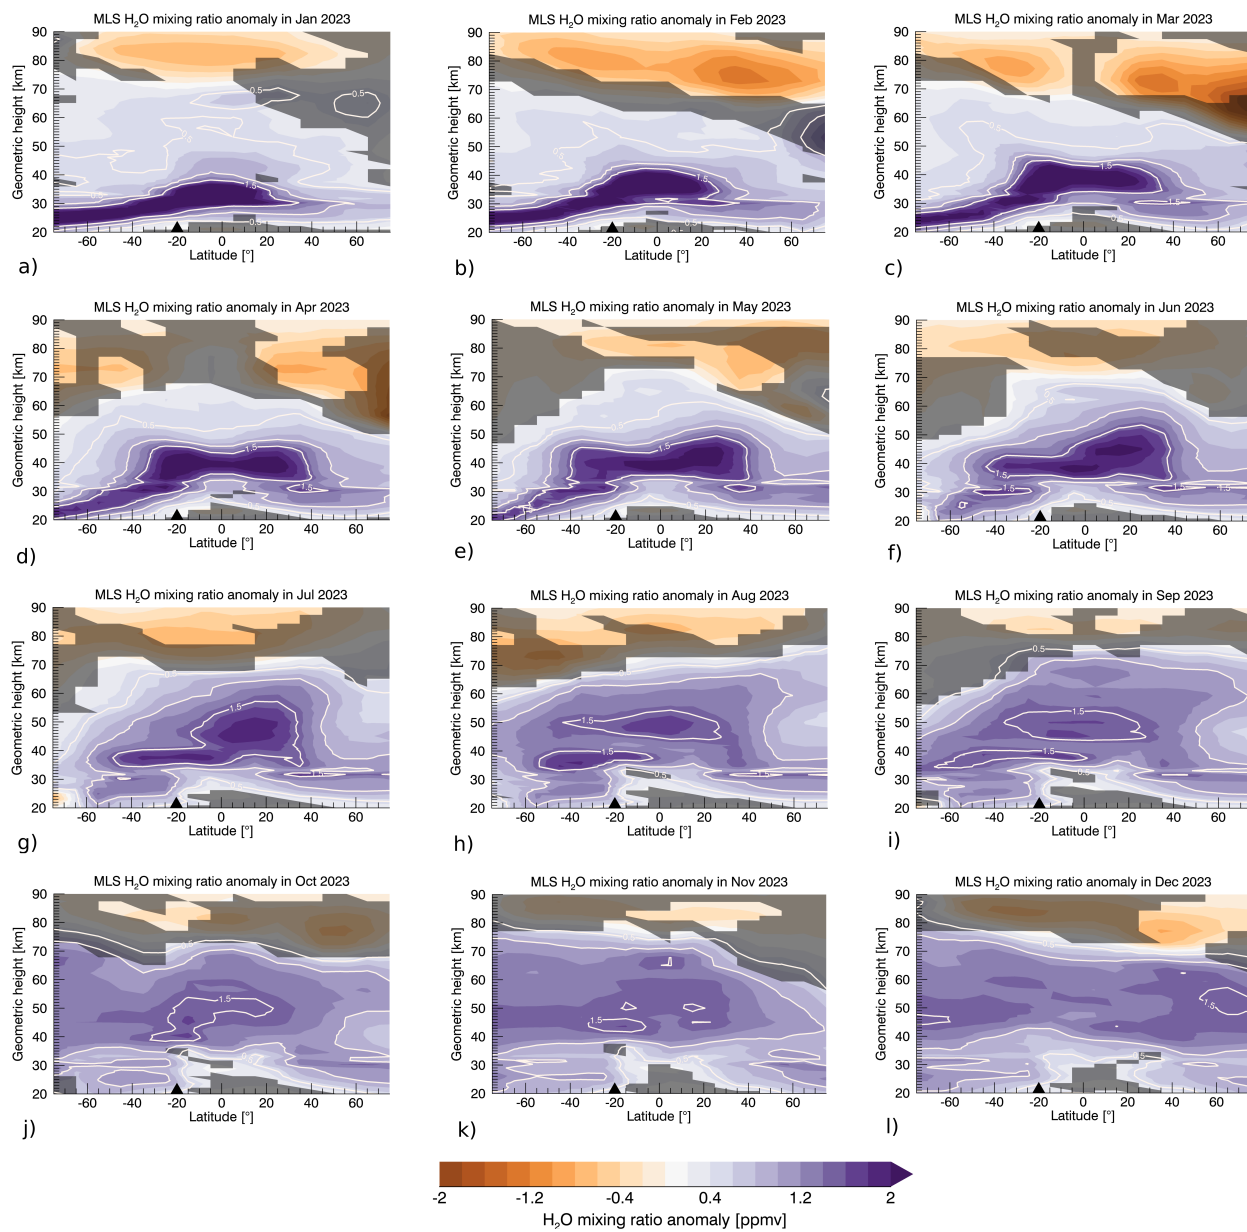

**Figure S2.** The same as in Figure S1, but for 2023.

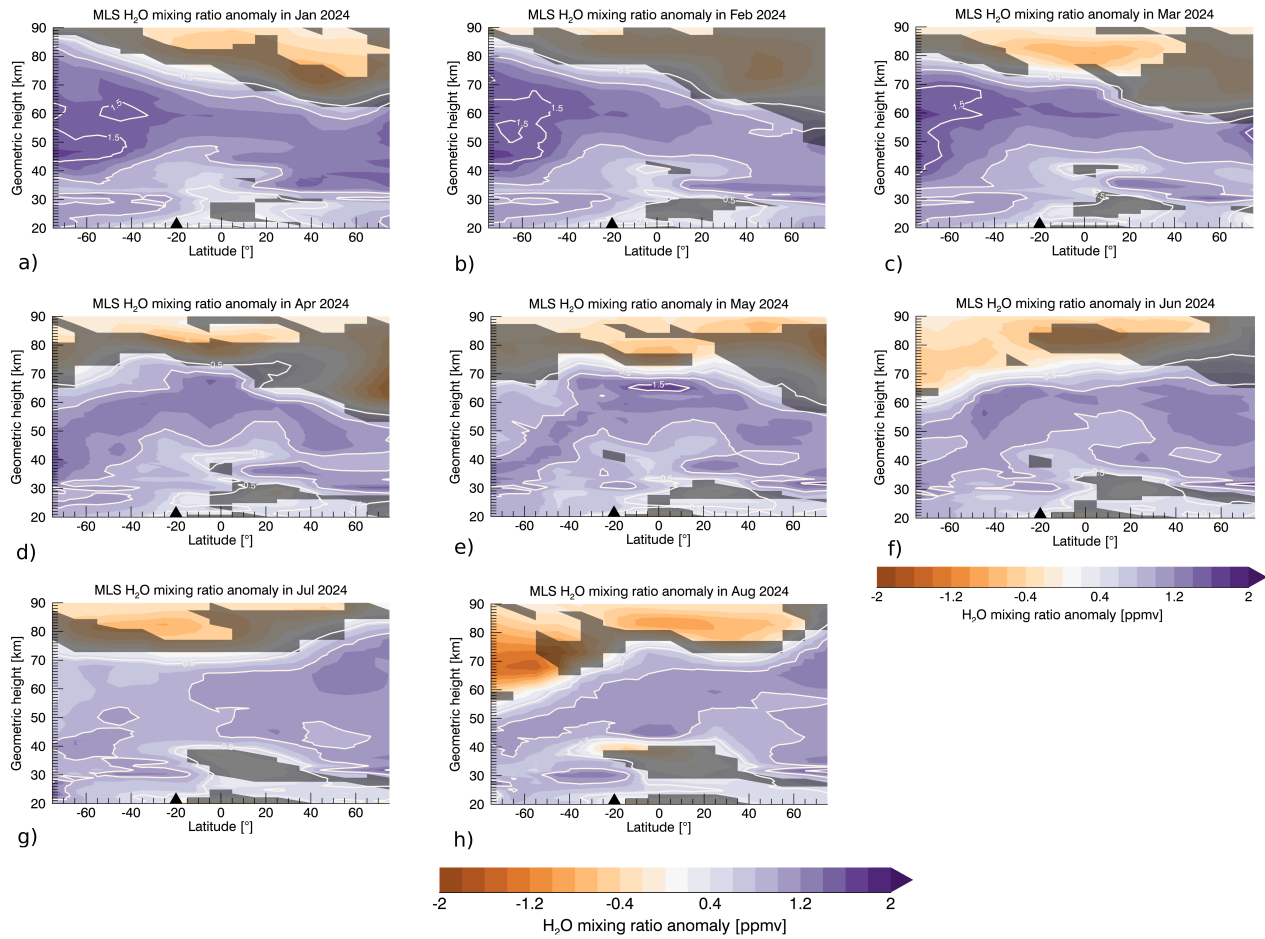

**Figure S3.** The same as in Figure S1, but for 2024.

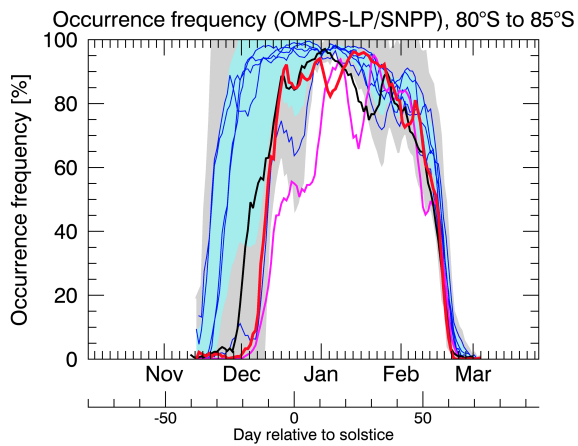

a)

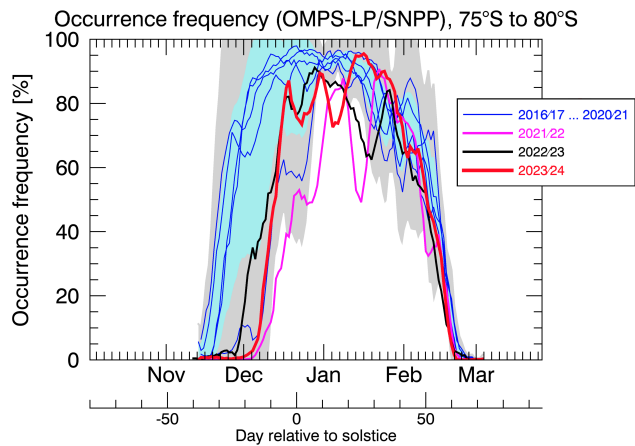

b)

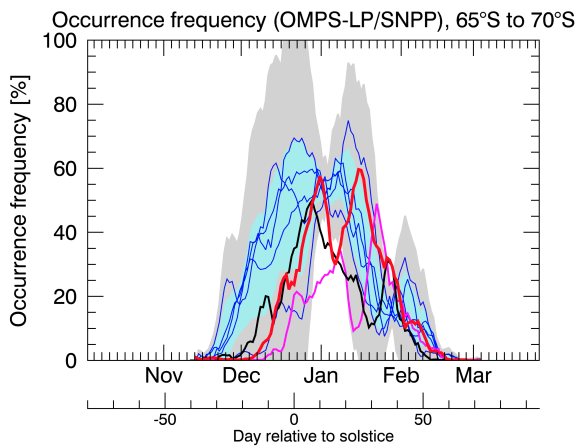

c)

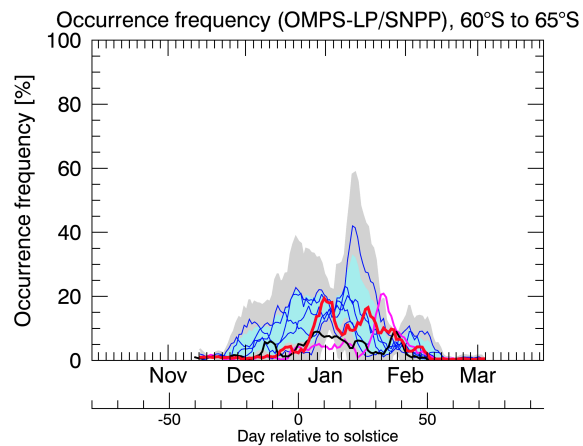

d)

**Figure S4.** NLC occurrence frequency from OMPS-LP for latitudes between 85°S - 65°S. The thick lines indicates the occurrence frequency for the SH seasons 2021/22 (magenta), 2022/23 (black) and 2023/24 (red), respectively. All seasons before are displayed as thin blue lines. The blue (grey) shaded region contains the averaged occurrence frequency for the years 2016/17 to 2020/21  $\pm$  one (three) standard deviation from this period. All occurrence frequencies are smoothed over 5 days and the day of solstice is December 21.

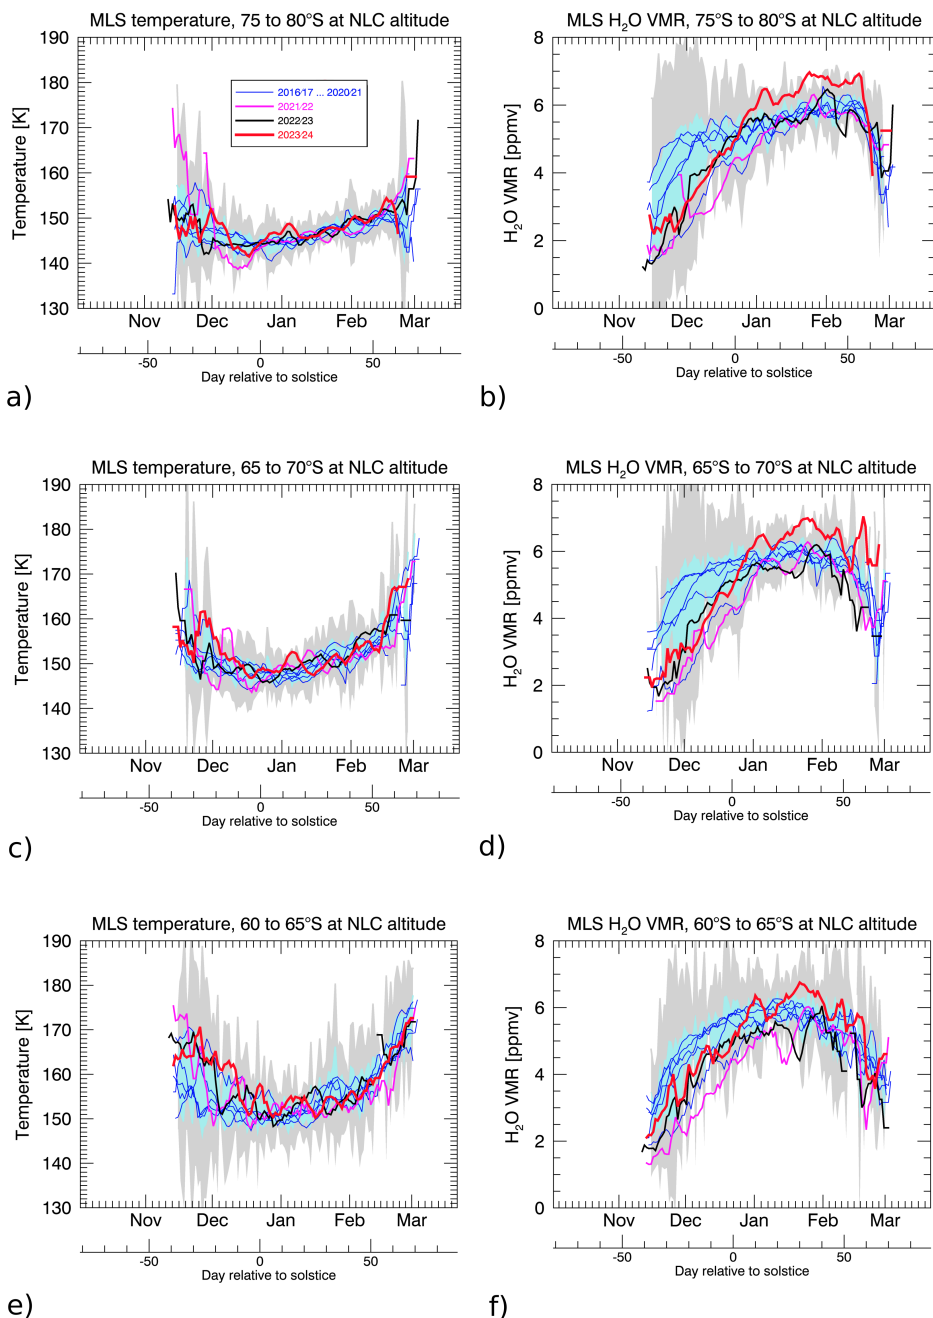

**Figure S5.** MLS temperature between 75°S - 80°S (a), 65°S - 70°S (c) and 60°S - 65°S (e) at NLC altitude determined from OMPS-LP measurements. The thick lines indicates the occurrence frequency for the SH seasons 2021/22 (magenta), 2022/23 (black) and 2023/24 (red), respectively. All seasons before are displayed as thin blue lines. Blue (grey) areas indicate the averaged temperature from 2016/17 to 2020/21  $\pm$  one (three) standard deviation. b), d) and f) depict the same latitude bins for MLS water vapour mixing ratios. All data is smoothed over 5 days.

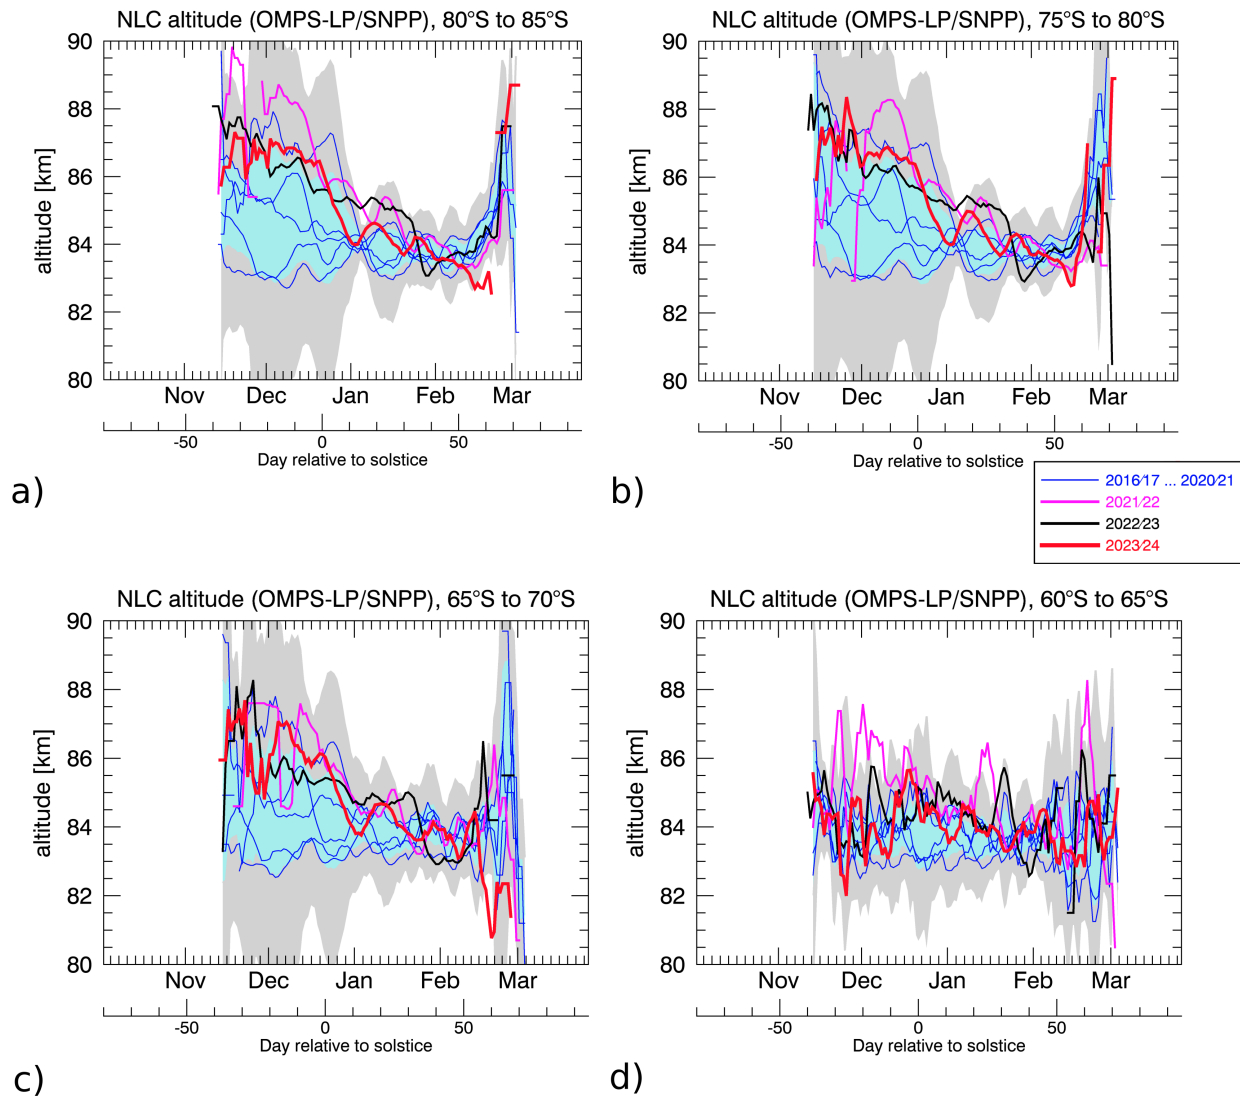

**Figure S6.** Altitude of the NLCs determined from OMPS-LP measurements for 80°S - 65°S (a - d). The thick red line shows the season 2023/24. Blue (grey) areas indicate the mean NLC altitude from 2016/17 to 2020/21  $\pm$  one (three) standard deviation.

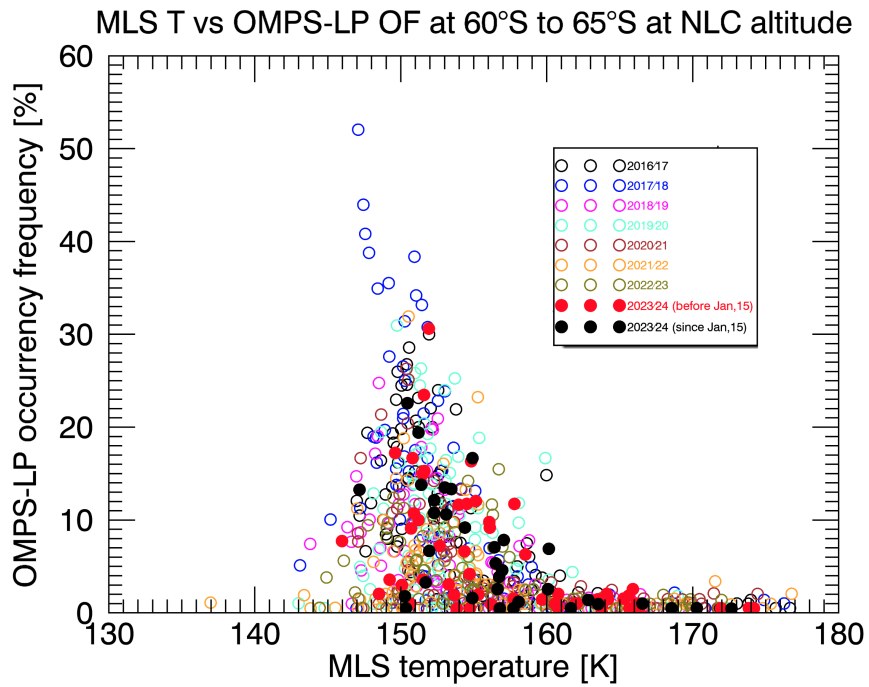

**Figure S7.** Scatterplot for OMPS-LP occurrence frequency versus MLS temperature at NLC altitude (determined from OMPS-LP measurements) for 60°S - 65°S. The measurements for 2023/24 are highlighted with filled circles using a red colour for measurements before January 15 and a black colour afterwards.



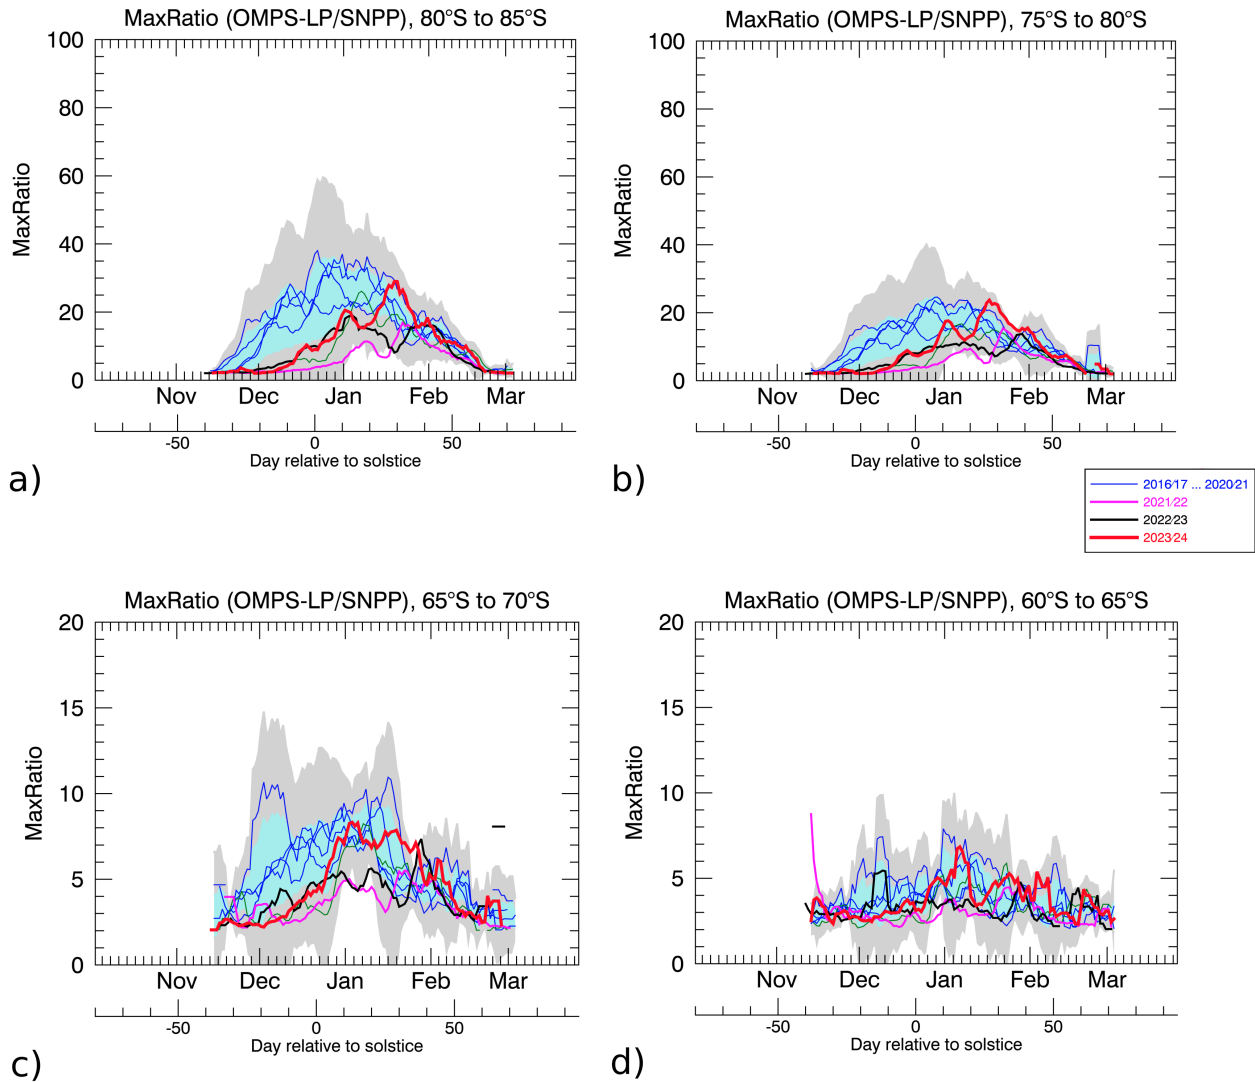

**Figure S8.** The maximum radiance ratio between the measured and background signal from OMPS-LP for each of the SH NLC seasons. The thick lines indicate zonally and daily mean maximum radiance ratios for 2021/22 (magenta), 2022/23 (black) and 2023/24 (red). All seasons before are displayed as thin blue lines. The blue (grey) shaded region contains the averaged maximum radiance ratio for the years 2016/17 to 2020/21  $\pm$  one (three) standard deviations from this period. All data is smoothed over 5 days and the day of solstice is December 21.

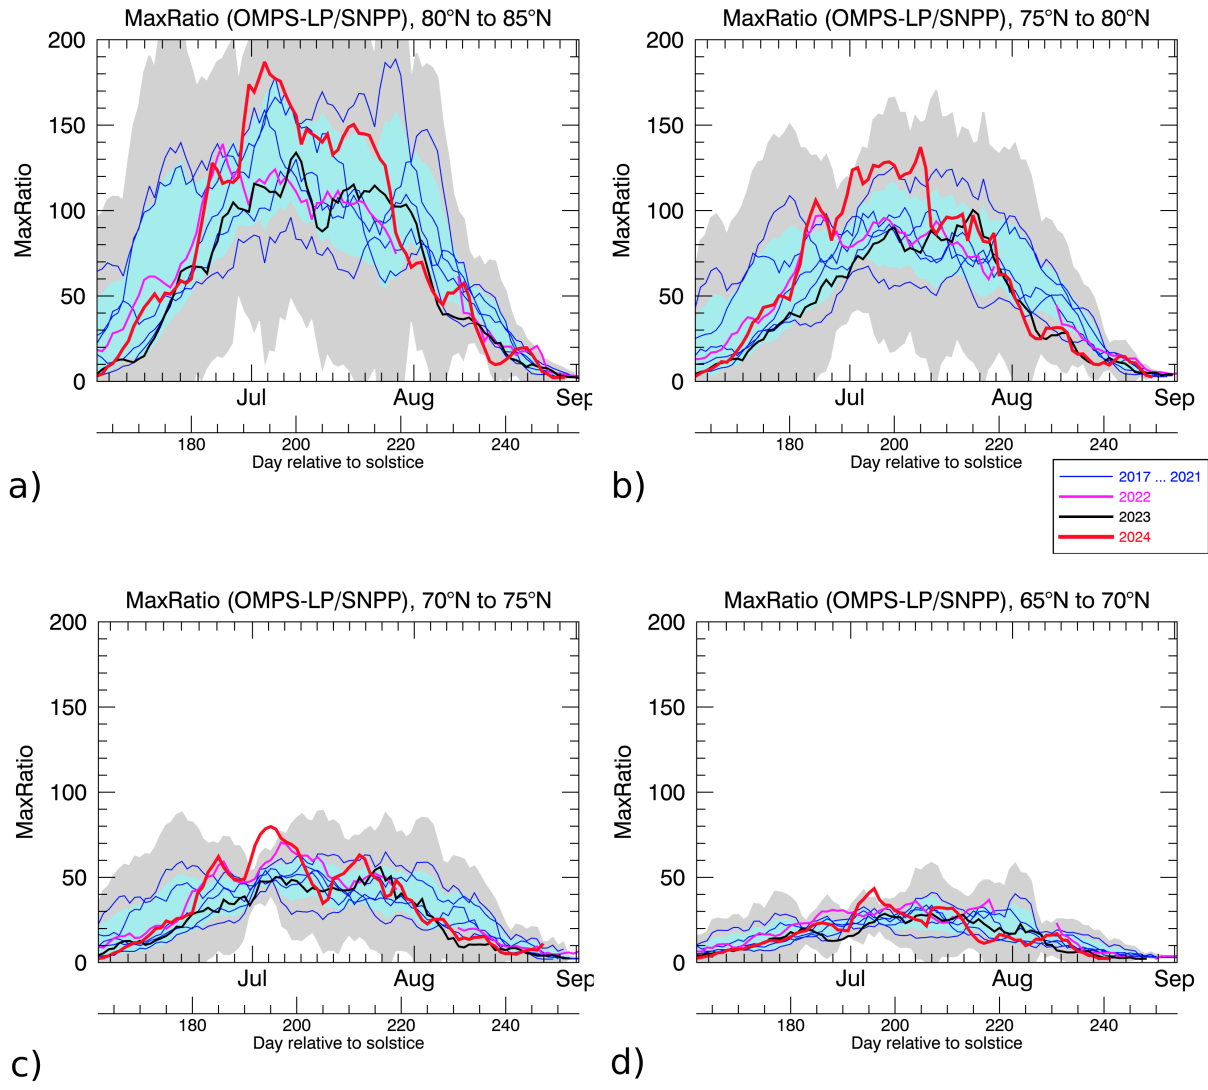

**Figure S9.** The same as in Figure S8 for the NH.
